# Supplementary material for: The Acquisition of Written Language: Response and Revision. Writing Research: Multidisciplinary Inquiries into the Nature of Writing Series.
Source: Royal Society of Chemistry journal article supplement (doi:10.1039/d3ay00751k), 1985-01-01
Supplement: d3ay00751k1.pdf [file d3ay00751k1.pdf]

## Supplementary Information

### **An affordable and semiautomated approach as novel strategy for the extraction of DNA using magnetic ionic liquid followed by real time-polymerase chain reaction**

Luiz Carlos Ferreira Neto<sup>1,2</sup>, Mônica Silva Alves<sup>1,2</sup>, Janira Prichula<sup>3,4</sup>, Grasiela Agnes<sup>1</sup>,  
Tiago Franco de Oliveira<sup>5</sup>, Danielle Trentin<sup>1,2</sup> e Josias Merib<sup>1,2,5\*</sup>

<sup>1</sup> Universidade Federal de Ciências da Saúde de Porto Alegre, Porto Alegre, RS 90050-170, Brazil;

<sup>2</sup> Programa de Pós-Graduação em Biociências, Universidade Federal de Ciências da Saúde de Porto Alegre, Porto Alegre, RS 90050-170, Brazil;

<sup>3</sup> Department of Ophthalmology, Massachusetts Eye and Ear Infirmary, Harvard Medical School, Boston, MA 02114, USA;

<sup>4</sup> Department of Microbiology, Harvard Medical School, Boston, MA 02115, USA;

<sup>5</sup> Departamento de Farmacociências, Universidade Federal de Ciências da Saúde de Porto Alegre, Porto Alegre, RS 90050-170, Brazil.

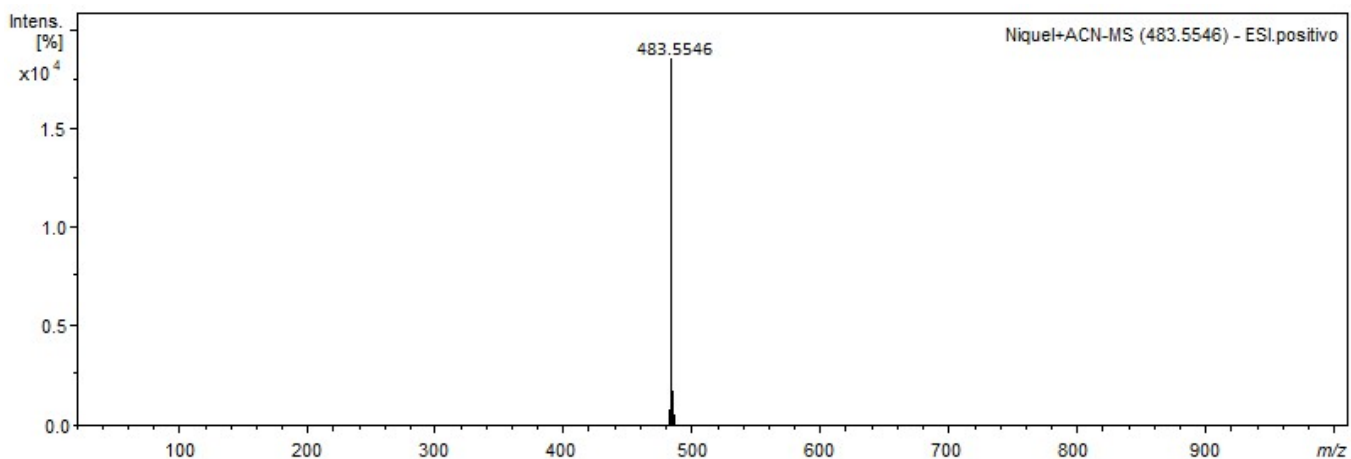

Figure 1S. Mass spectra obtained for the cation  $[P_{66614}^+]$ , ESI+, 1.0 ng mL<sup>-1</sup>.

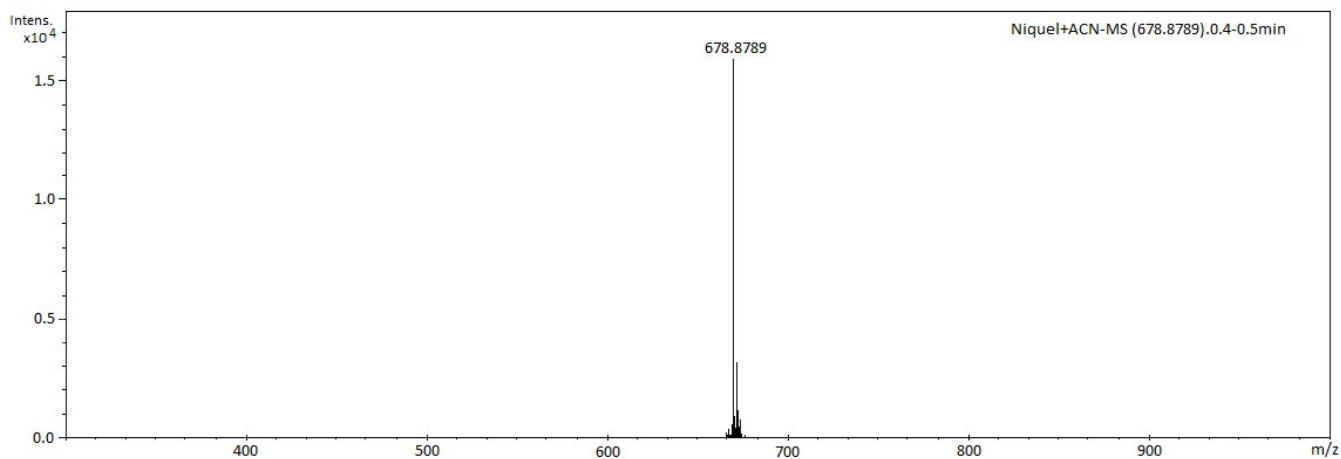

Figure 2S. Mass spectra obtained for the anion  $[Ni(II)(hfacac)_3^-]$ , ESI-, 1.0 ng mL<sup>-1</sup>.

### Melt Curve

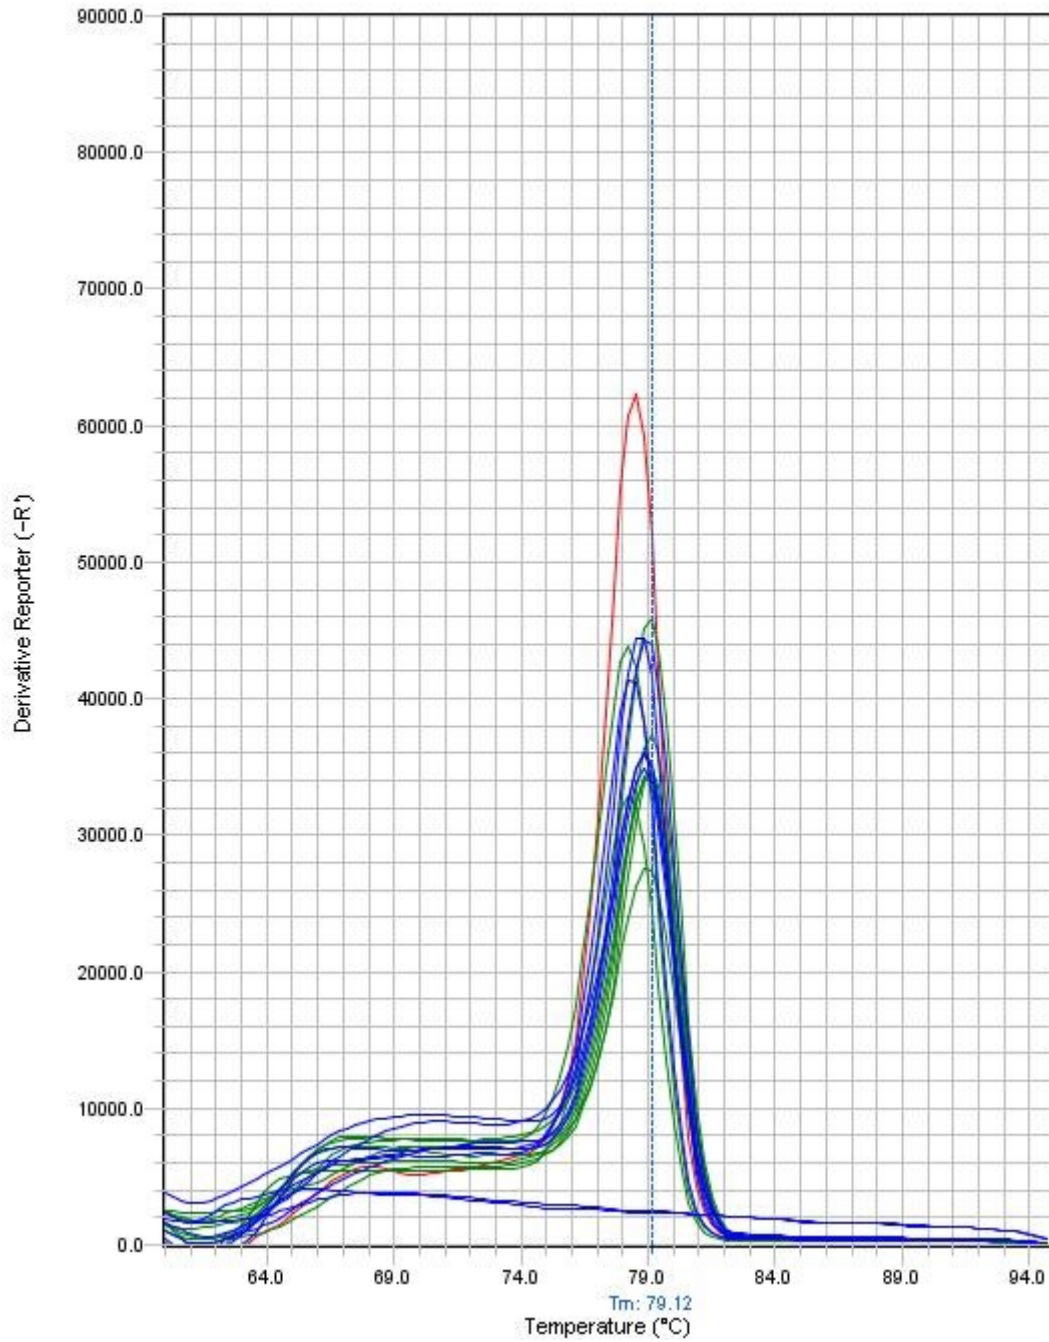

Figure 3S. Melt curve obtained after the extractions using positive control (red line); extractions from water samples spiked with DNA (blue line); and extractions from whole blood samples.
